# Supplementary material
Source: Springer Nature journal article supplement (https://www.springermedizin.de/resource/supplementary/12885_2010_2757_MOESM7_ESM.pdf/9461814)

**A. Traits plotted by WGCNA\* mortality groups.**

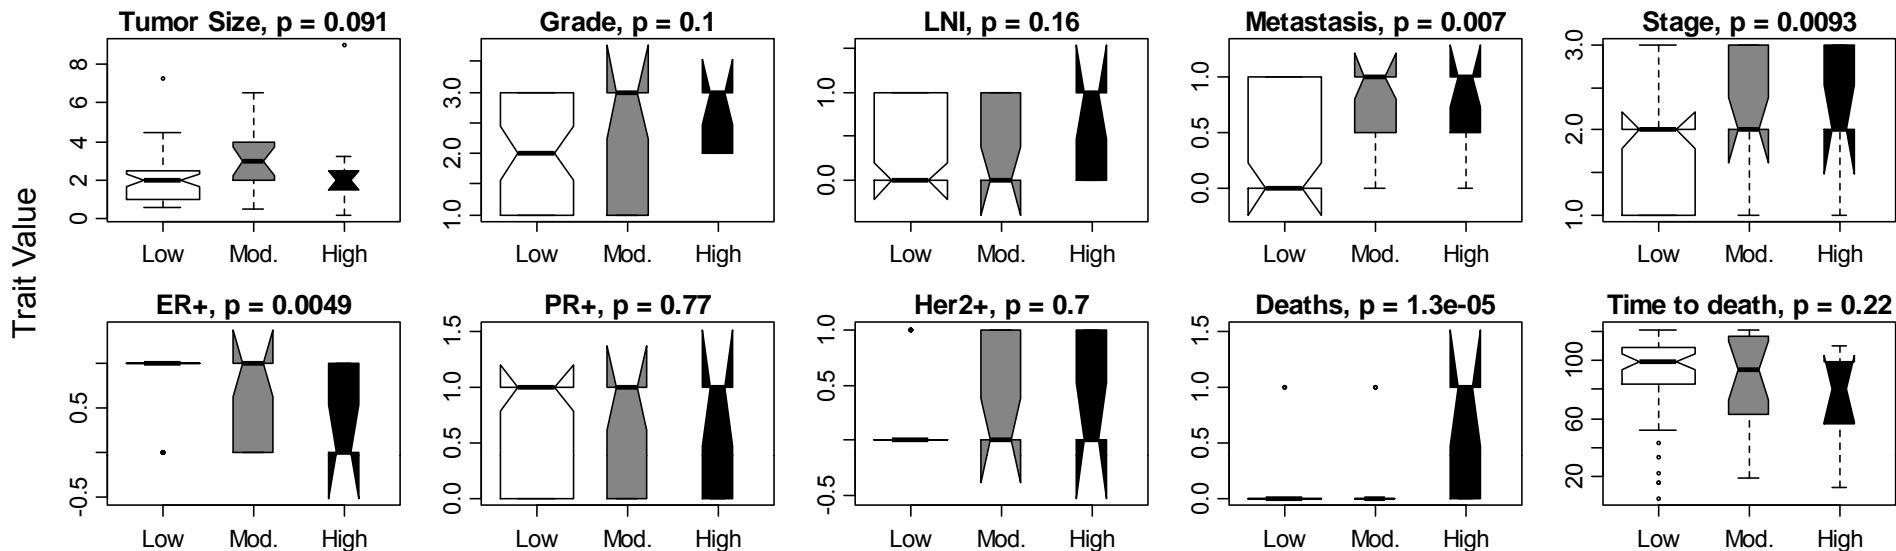

**B. Markers related to survival ( $p < 0.05$ ) plotted by WGCNA\* mortality groups.**

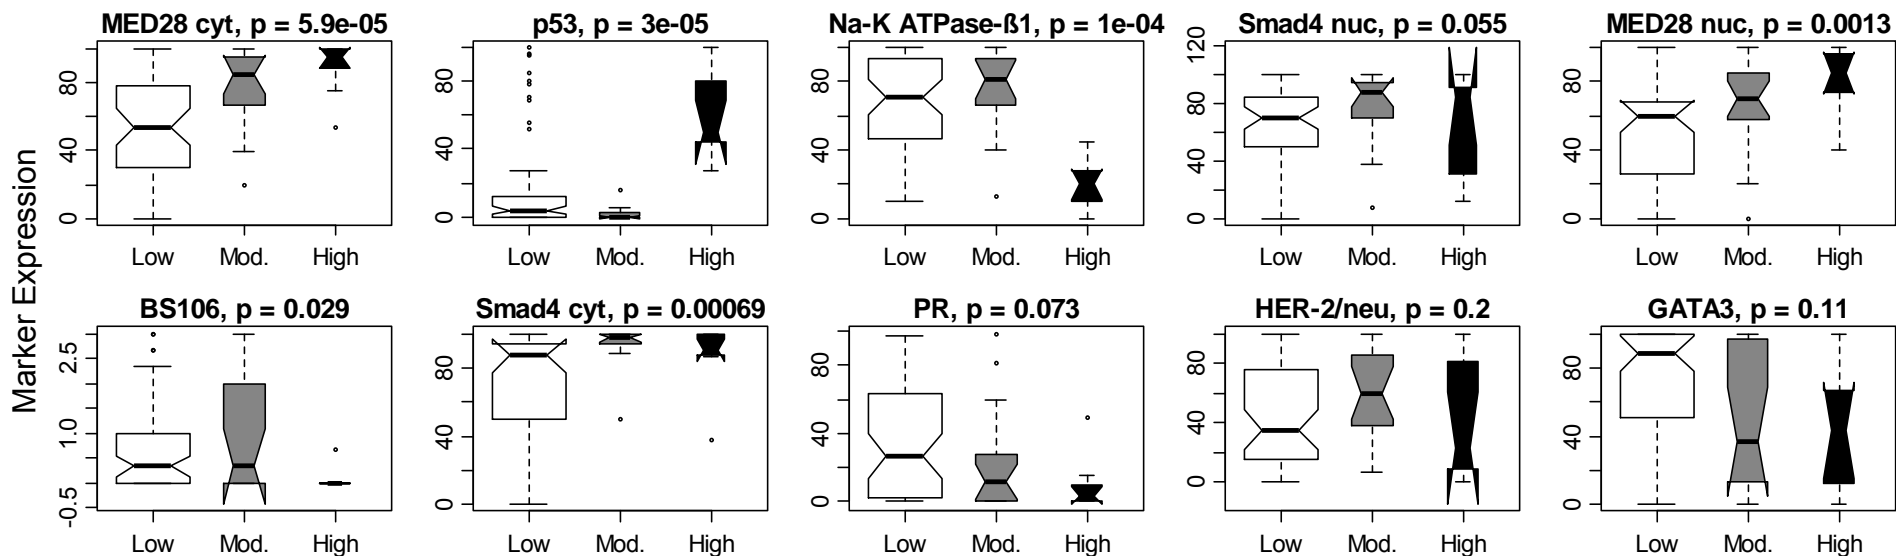

Supplement: MOESM7 [file 9461814]
